# Supplementary material
Source: PubMed Central journal article supplement (PMC4786454)
Supplement: NIHMS738063-supplement-2.pdf [file NIHMS738063-supplement-2.pdf]

## SUPPLEMENTARY MATERIAL

### TITLE

Megabase-scale haplotypes of germline and cancer genomes using linked-read sequencing

### Authors:

Grace X.Y. Zheng<sup>1,†</sup>, Billy T. Lau<sup>2,†</sup>, Michael Schnall-Levin<sup>1</sup>, Mirna Jarosz<sup>1</sup>, John M. Bell<sup>2</sup>, Christopher M. Hindson<sup>1</sup>, Sofia Kyriazopoulou-Panagiotopoulou<sup>1</sup>, Donald A. Masquelier<sup>1</sup>, Landon Merrill<sup>1</sup>, Jessica M. Terry<sup>1</sup>, Patrice A. Mudivarti<sup>1</sup>, Paul W. Wyatt<sup>1</sup>, Rajiv Bharadwaj<sup>1</sup>, Anthony J. Makarewicz<sup>1</sup>, Yuan Li<sup>1</sup>, Phillip Belgrader<sup>1</sup>, Andrew D. Price<sup>1</sup>, Adam J. Lowe<sup>1</sup>, Patrick Marks<sup>1</sup>, Gerard M. Vurens<sup>1</sup>, Paul Hardenbol<sup>1</sup>, Luz Montesclaros<sup>1</sup>, Melissa Luo<sup>1</sup>, Lawrence Greenfield<sup>1</sup>, Alexander Wong<sup>1</sup>, David E. Birch<sup>1</sup>, Steven W. Short<sup>1</sup>, Keith P. Bjornson<sup>1</sup>, Pranav Patel<sup>1</sup>, Erik S. Hopmans<sup>2</sup>, Christina Wood<sup>3</sup>, Sukhvinder Kaur<sup>1</sup>, Glenn K. Lockwood<sup>1</sup>, David Stafford<sup>1</sup>, Joshua P. Delaney<sup>1</sup>, Indira Wu<sup>1</sup>, Heather S. Ordonez<sup>1</sup>, Susan M. Grimes<sup>2</sup>, Stephanie Greer<sup>3</sup>, Josephine Y. Lee<sup>1</sup>, Kamila Belhocine<sup>1</sup>, Kristina M. Giorda<sup>1</sup>, William H. Heaton<sup>1</sup>, Geoffrey P. McDermott<sup>1</sup>, Zachary W. Bent<sup>1</sup>, Francesca Meschi<sup>1</sup>, Nikola O. Kondov<sup>1</sup>, Ryan Wilson<sup>1</sup>, Jorge A. Bernate<sup>1</sup>, Shawn Gauby<sup>1</sup>, Alex Kindwall<sup>1</sup>, Clara Bermejo<sup>1</sup>, Adrian N. Fehr<sup>1</sup>, Adrian Chan<sup>1</sup>, Serge Saxonov<sup>1</sup>, Kevin D. Ness<sup>1</sup>, Benjamin J. Hindson<sup>1</sup>, Hanlee P. Ji<sup>2,3</sup>

† These authors contributed equally to this work.

### Institutions:

<sup>1</sup>10X Genomics, Pleasanton CA, United States, 94305

<sup>2</sup>Stanford Genome Technology Center, Stanford University, Palo Alto, CA, United States, 94304

<sup>3</sup>Division of Oncology, Department of Medicine, Stanford University School of Medicine, Stanford, CA, United States, 94305

**Corresponding Authors:**

Hanlee P. Ji

Email: [genomics\\_ji@stanford.edu](mailto:genomics_ji@stanford.edu)

Benjamin J. Hindson

Email: [ben@10xgenomics.com](mailto:ben@10xgenomics.com)

## **Outline of Supplementary Material**

Supplementary Figure 1. Barcode sequencing library and analysis software workflow.

Supplementary Figure 2. Sequencing and phasing performance of NA12878 trio.

Supplementary Figure 3. Comparison between barcoded and standard TruSeq libraries.

Supplementary Figure 4. Barcode overlap of structural variants.

Supplementary Figure 5. Barcode count analysis of eight deletion candidates in linked-read WGS data from NA12878.

Supplementary Figure 6. Validation of genomic deletions with targeted sequencing.

Supplementary Figure 7. *ALK* gene fusions in NA12878 exome and NCI-H2228 WGS data.

-----  
Supplementary Table 1. Coverage statistics of all samples with WGS data.

Supplementary Table 2. Shearing size of phased samples.

Supplementary Table 3. Downsampling sequence data to determine WGS phasing performance.

Supplementary Table 4. Summary of SNVs in the nuclear trio, NA20847, and Patient 1532 normal-tumor pair.

Supplementary Table 5. Genomic deletions of NA12878 (a) and NA12882 (b).

Supplementary Table 6. Inheritance pattern of the deletion candidates and summary of reads from targeted sequencing to validate the deletion candidates.

Supplementary Table 8. Comparison of structural variants called in NA12878 against deletions from Pendleton et. al., 2015.

Supplementary Table 9. *ALK-EML4* and *ALK-PTPN3* gene fusions called in exome data from H2228 cell line.

Supplementary Table 10. Summary of candidate deleterious mutations in Patient 1532 normal and tumor pair.

Supplementary Table 11. Tumor-specific structural variants in Patient 1532.

Supplementary Table 12. List of copy number alterations determined by linked-read analysis and short read segmentation.

Supplementary Table 13. Comparison of different phasing approaches.

-----  
Supplementary Note 1. Phasing linked reads

Supplementary Note 2. Structural variant calling from linked-read data

## **Additional Supplementary Tables as separate files.**

Supplementary Table 7. Oligonucleotide sequences used to validate genomic deletions with targeted sequencing.

**Supplementary Table 1. Coverage statistics of all samples with WGS data.** Patient 1532 was sequenced using both standard short read WGS and barcode libraries from the 10X GemCode platform.

| Samples                                     | Phased  |         |         |         |           | Illumina TruSeq | Patient 1532    |           |        |           |
|---------------------------------------------|---------|---------|---------|---------|-----------|-----------------|-----------------|-----------|--------|-----------|
|                                             | NA12878 | NA12877 | NA12882 | NA20847 | NCI-H2228 | NA12878         | Illumina TruSeq |           | Phased |           |
|                                             |         |         |         |         |           |                 | Normal          | Malignant | Normal | Malignant |
| <b>Mapped sequence (Gb)</b>                 | 101.09  | 88.98   | 93.26   | 83.65   | 82.21     | 88.27           | 127.7           | 149.9     | 80.93  | 83.26     |
| <b>Average haploid coverage</b>             | 37      | 34      | 36      | 32      | 32        | 34              | 44.6            | 52.3      | 31     | 32        |
| <b>Coverage of genome (%)</b>               | 90.11%  | 90.16%  | 90.15%  | 89.90%  | 89.70%    | 90.31%          | 99.26%          | 99.26%    | 89.85% | 89.53%    |
| <b>10X or greater sequence coverage (%)</b> | 86.20%  | 86.22%  | 86.31%  | 84.30%  | 80.33%    | 90.13%          | 99.00%          | 99.03%    | 81.30% | 78.15%    |
| <b>20X or greater sequence coverage (%)</b> | 72.68%  | 70.22%  | 72.05%  | 67.80%  | 60.69%    | 87.59%          | 98.27%          | 98.50%    | 60.02% | 56.85%    |
| <b>30X or greater sequence coverage (%)</b> | 55.57%  | 51.46%  | 54.80%  | 47.70%  | 44.01%    | 73.47%          | 93.47%          | 94.94%    | 40.12% | 39.10%    |

**Supplementary Table 2. Shearing size of phased samples.** Samples subject to WGS and exome analysis are sheared to the sizes listed in the table before end-repair and ligation of P7 adaptor.

| <b>Phased Sample Shearing Sizes</b> |                                 |
|-------------------------------------|---------------------------------|
| <b>Sample</b>                       | <b>Size of the library (bp)</b> |
| NA12878 WGS                         | 250                             |
| NA12877 WGS                         | 500                             |
| NA12882 WGS                         | 500                             |
| NA20847 WGS                         | 250                             |
| Patient samples                     | 250                             |
| All exome samples                   | 250                             |

**Supplementary Table 3. Downsampling sequence data to determine WGS phasing performance.**

| <b>NA12878</b>                         |            |            |            |            |           |           |
|----------------------------------------|------------|------------|------------|------------|-----------|-----------|
| <b>Coverage</b>                        | 37         | 26         | 23         | 17         | 13        | 10        |
| <b>% SNPs phased</b>                   | 99         | 97         | 97         | 96         | 95        | 93        |
| <b>% genes phased (&lt;100 kb)</b>     | 97         | 96         | 96         | 95         | 93        | 91        |
| <b>N50 phase block (bases)</b>         | 2,834,437  | 2,523,822  | 2,341,608  | 1,868,683  | 1,496,897 | 1,124,096 |
| <b>Longest phase block (bases)</b>     | 14,557,822 | 12,014,277 | 10,312,095 | 11,893,726 | 7,224,068 | 6,162,317 |
| <b>SNV short switch error rate (%)</b> | 0.01%      | 0.21%      | 0.25%      | 0.34%      | 0.51%     | 0.84%     |
| <b>SNV long switch error rate (%)</b>  | 0.01%      | 0.02%      | 0.02%      | 0.02%      | 0.02%     | 0.03%     |

**Supplementary Table 4. Summary of SNVs in the nuclear trio, NA20847, and patient 1532 normal-tumor pair.**

|                            | <b>NA12878</b> | <b>NA12877</b> | <b>NA12882</b> | <b>NA20847</b> | <b>Patient 1532 normal</b> | <b>Patient 1532 tumor</b> |
|----------------------------|----------------|----------------|----------------|----------------|----------------------------|---------------------------|
| <b>SNVs</b>                | 3,743,419      | 3,805,278      | 3,519,124      | 3,267,971      | 3,322,293                  | 3,292,639                 |
| <b>Heterozygous SNVs</b>   | 2,377,169      | 2,252,548      | 2,140,360      | 1,896,984      | 1,955,426                  | 1,890,051                 |
| <b>Indels</b>              | 889,946        | 787,433        | 516,580        | -              | 714,475                    | 718,416                   |
| <b>Heterozygous indels</b> | 734,685        | 641,090        | 346,153        | -              | 447,794                    | 448,663                   |

Supplementary Table 5. Genomic deletions of NA12878 (a) and NA12882 (b).

| <b>(a) NA12878 deletions discussed in the text</b> |                           |                               |                           |                      |                          |                       |                      |                                   |
|----------------------------------------------------|---------------------------|-------------------------------|---------------------------|----------------------|--------------------------|-----------------------|----------------------|-----------------------------------|
| <b>Predicted deletion start</b>                    |                           | <b>Predicted deletion end</b> |                           |                      |                          |                       |                      |                                   |
| <b>Chr</b>                                         | <b>Breakpoint 1</b>       | <b>Chr</b>                    | <b>Breakpoint 2</b>       | <b>Quality score</b> | <b># Barcode overlap</b> | <b># Paired reads</b> | <b># Split reads</b> | <b>Read pair likelihood ratio</b> |
| 3                                                  | 162,512,134 - 162,512,135 | 3                             | 162,626,332 - 162,626,335 | 472                  | 41                       | 9                     | 5                    | 176                               |
| 1                                                  | 189,704,510 - 189,704,521 | 1                             | 189,783,385 - 189,783,396 | 458                  | 37                       | 6                     | 0                    | 70                                |
| 6                                                  | 78,950,000 - 78,960,000   | 6                             | 79,040,000 - 79,050,000   | 456                  | 36                       | 0                     | 1                    | 14                                |
| 8                                                  | 39,220,000 - 39,230,000   | 8                             | 39,390,000 - 39,400,000   | 455                  | 36                       | 0                     | 1                    | 14                                |
| 5                                                  | 104,432,115 - 104,432,116 | 5                             | 104,503,670 - 104,503,673 | 404                  | 33                       | 7                     | 3                    | 123                               |
| <b>(b) NA12882 deletions discussed in the text</b> |                           |                               |                           |                      |                          |                       |                      |                                   |
| <b>Predicted deletion start</b>                    |                           | <b>Predicted deletion end</b> |                           |                      |                          |                       |                      |                                   |
| <b>Chr</b>                                         | <b>Breakpoint 1</b>       | <b>Chr</b>                    | <b>Breakpoint 2</b>       | <b>Quality score</b> | <b># Barcode overlap</b> | <b># Paired reads</b> | <b># Split reads</b> | <b>Read pair likelihood ratio</b> |
| 5                                                  | 104,432,113 - 104,432,116 | 5                             | 104,503,670 - 104,503,673 | 633                  | 58                       | 10                    | 7                    | 214                               |
| 8                                                  | 39,231,935 - 39,231,952   | 8                             | 39,387,240 - 39,387,257   | 584                  | 50                       | 4                     | 0                    | 49                                |
| 3                                                  | 162,512,134 - 162,512,137 | 3                             | 162,626,332 - 162,626,335 | 370                  | 33                       | 9                     | 5                    | 175                               |



**Supplementary Table 6. Inheritance pattern of the deletion candidates and summary of reads from targeted sequencing to validate the deletion candidates.**

| Inheritance Table                                                                                                                                                                                                                                                                                                                                                                                                                                                                                                                                                                                                                                                                                      |                            |          |         |          |    |          |        | NA12878 breakpoint (mother) |        |        | NA12877 breakpoint (father) |        |        | NA12882 breakpoint (child) |      |      | % of bases with low mappability |
|--------------------------------------------------------------------------------------------------------------------------------------------------------------------------------------------------------------------------------------------------------------------------------------------------------------------------------------------------------------------------------------------------------------------------------------------------------------------------------------------------------------------------------------------------------------------------------------------------------------------------------------------------------------------------------------------------------|----------------------------|----------|---------|----------|----|----------|--------|-----------------------------|--------|--------|-----------------------------|--------|--------|----------------------------|------|------|---------------------------------|
| Chr                                                                                                                                                                                                                                                                                                                                                                                                                                                                                                                                                                                                                                                                                                    | Location                   | NA12878  | NA12877 | NA12882  |    | across   | beyond | ambiguous                   | across | beyond | ambiguous                   | across | beyond | ambiguous                  |      |      |                                 |
| <b>High scoring SV candidates:</b>                                                                                                                                                                                                                                                                                                                                                                                                                                                                                                                                                                                                                                                                     |                            |          |         |          |    |          |        |                             |        |        |                             |        |        |                            |      |      |                                 |
| 1                                                                                                                                                                                                                                                                                                                                                                                                                                                                                                                                                                                                                                                                                                      | 189,704,509 - 189,783,359  | <u>1</u> | 2       | 3        | 4  | 2        | 3      | 332                         | 609    | 0      | 0                           | 0      | 0      | 0                          | 0    | 0    | 0%                              |
| 3                                                                                                                                                                                                                                                                                                                                                                                                                                                                                                                                                                                                                                                                                                      | 162,512,134 - 162,626,335  | <u>1</u> | 2       | 3        | 4  | <u>1</u> | 3      | 671                         | 860    | 0      | 0                           | 0      | 0      | 539                        | 847  | 0    | 0.22%                           |
| 5                                                                                                                                                                                                                                                                                                                                                                                                                                                                                                                                                                                                                                                                                                      | 104,432,113 - 104,503,673  | <u>1</u> | 2       | NP       | NP | <u>1</u> | NP     | 199                         | 350    | 0      | 0                           | 0      | 0      | 158                        | 323  | 0    | 0.02%                           |
| 6                                                                                                                                                                                                                                                                                                                                                                                                                                                                                                                                                                                                                                                                                                      | 78,967,194 - 79,036,419    | <u>1</u> | 2       | <u>3</u> | 4  | 2        | 4      | 48                          | 698    | 0      | 52                          | 253    | 5      | 0                          | 0    | 0    | 1.86%                           |
| 8                                                                                                                                                                                                                                                                                                                                                                                                                                                                                                                                                                                                                                                                                                      | 39,232,074 - 39,387,229    | <u>1</u> | 2       | 3        | 4  | <u>1</u> | 4      | 346                         | 937    | 0      | 0                           | 0      | 0      | 417                        | 904  | 0    | 10.21%                          |
| <b>Low scoring SV candidates:</b>                                                                                                                                                                                                                                                                                                                                                                                                                                                                                                                                                                                                                                                                      |                            |          |         |          |    |          |        |                             |        |        |                             |        |        |                            |      |      |                                 |
| 5                                                                                                                                                                                                                                                                                                                                                                                                                                                                                                                                                                                                                                                                                                      | 99,400,881 - 99,715,015    | 1        | 2       | 3        | 4  | 1        | 4      | 35                          | 212    | 8776   | 0                           | 216    | 7094   | 18                         | 166  | 7155 | 61.65%                          |
| 14                                                                                                                                                                                                                                                                                                                                                                                                                                                                                                                                                                                                                                                                                                     | 37,631,609 - 37,771,228    | 1        | 2       | 3        | 4  | 2        | 4      | 552                         | 20     | 223    | 558                         | 28     | 223    | 395                        | 30   | 173  | 10.50%                          |
| 14                                                                                                                                                                                                                                                                                                                                                                                                                                                                                                                                                                                                                                                                                                     | 106,932,640 - 107,174,931* | 1        | 2       | 3        | 4  | 2        | 4      | 2065                        | 4401   | 46     | 1777                        | 4657   | 82     | 1879                       | 4382 | 25   | 9.59%                           |
| <p><b><u>underlined</u> = deletion candidate</b></p> <p><b>NP = unphased due to lack of heterozygous SNPs</b></p> <p><b>"across breakpoint" indicates a soft - clipped chimeric sequence</b></p> <p><b>"beyond breakpoint" indicates a non - clipped read aligning on the opposite side of the breakpoints from its associated primer - probe within 1 Kb of breakpoint</b></p> <p><b>"ambiguous" indicates aligning beyond the opposite breakpoint when it is a control (i.e. oriented in wrong direction or inside breakpoints)</b></p> <p><b>mappability is based on UCSC 75mer and describes 1 kb regions to the outside of both breakpoints</b></p> <p><b>* in a VDJ recombination region</b></p> |                            |          |         |          |    |          |        |                             |        |        |                             |        |        |                            |      |      |                                 |

**Supplementary Table 8. Comparison of structural variants called in NA12878 against deletions from Pendleton et. al., 2015.**

| chr | breakpoint1 start | breakpoint1 stop | chr | breakpoint2 start | breakpoint2 stop | quality score | "confident" set from Pendleton et. al. <sup>1</sup> | "relaxed" set from Pendleton et. al. <sup>1</sup> | short read callers support     |
|-----|-------------------|------------------|-----|-------------------|------------------|---------------|-----------------------------------------------------|---------------------------------------------------|--------------------------------|
| 4   | 34770000          | 34780000         | 4   | 34830000          | 34840000         | 930           | Y                                                   | Y                                                 |                                |
| 2   | 52749686          | 52749689         | 2   | 52785268          | 52785270         | 834           | Y                                                   | Y                                                 |                                |
| 1   | 72766324          | 72766327         | 1   | 72811837          | 72811840         | 734           | Y                                                   | Y                                                 |                                |
| 7   | 54280000          | 54290000         | 7   | 54370000          | 54380000         | 560           |                                                     |                                                   | Kidd et. al. <sup>2</sup>      |
| 20  | 1540000           | 1550000          | 20  | 1600000           | 1610000          | 505           |                                                     |                                                   |                                |
| 3   | 162512134         | 162512135        | 3   | 162626332         | 162626335        | 472           |                                                     | Y                                                 |                                |
| 1   | 189704510         | 189704521        | 1   | 189783385         | 189783396        | 458           | Y                                                   | Y                                                 |                                |
| 6   | 78950000          | 78960000         | 6   | 79040000          | 79050000         | 456           | Y                                                   | Y                                                 |                                |
| 8   | 39220000          | 39230000         | 8   | 39390000          | 39400000         | 455           |                                                     | Y                                                 |                                |
| 5   | 104432115         | 104432116        | 5   | 104503670         | 104503673        | 404           | Y                                                   | Y                                                 |                                |
| 1   | 152530000         | 152540000        | 1   | 152590000         | 152600000        | 402           | Y                                                   | Y                                                 |                                |
| 16  | 34380000          | 34390000         | 16  | 34740000          | 34750000         | 402           |                                                     |                                                   | Kidd et. al. <sup>2</sup>      |
| 4   | 161020000         | 161030000        | 4   | 161080000         | 161090000        | 369           |                                                     | Y                                                 |                                |
| 2   | 34680000          | 34690000         | 2   | 34740000          | 34750000         | 363           | Y                                                   | Y                                                 |                                |
| 11  | 108585765         | 108585777        | 13  | 21727722          | 21727734         | 323           |                                                     |                                                   | Pendleton et. al. <sup>1</sup> |
| 15  | 64970000          | 64980000         | X   | 7100000           | 7110000          | 281           |                                                     |                                                   |                                |
| 13  | 47250000          | 47260000         | 13  | 107250000         | 107260000        | 269           |                                                     |                                                   |                                |
| 15  | 85510000          | 85520000         | 3   | 189600000         | 189610000        | 242           |                                                     |                                                   |                                |
| 4   | 34770000          | 34780000         | 4   | 34880000          | 34890000         | 237           |                                                     |                                                   |                                |
| 7   | 88420000          | 88430000         | 8   | 9070000           | 9080000          | 218           |                                                     |                                                   |                                |

**Supplementary Table 9. *ALK-EML4* and *ALK-PTPN3* gene fusions called in exome data from H2228 cell line.**

| Predicted SV start |                         | Predicted SV end |                              |               |                   |                |               |                            |
|--------------------|-------------------------|------------------|------------------------------|---------------|-------------------|----------------|---------------|----------------------------|
| Chr                | Breakpoint 1            | Chr              | Breakpoint 2                 | Quality score | # Barcode overlap | # Paired reads | # Split reads | Read pair likelihood ratio |
| 2                  | 29,435,765 - 29,452,584 | 2                | 42,471,639 - 42,484,792      | 128           | 17                | 0              | 1             | 14                         |
| 2                  | 42,542,089 - 42,545,770 | 9                | 102,818,990 -<br>102,821,171 | 109           | 13                | 1              | 0             | 12                         |

Supplementary Table 10. Summary of candidate deleterious mutations in Patient 1532 normal and tumor pair.

| Sequencing comparison between short read and phased results |             |     |     |          |          |                |                |          |       |     |     |            |            |       |                |                           |   |                           |         |
|-------------------------------------------------------------|-------------|-----|-----|----------|----------|----------------|----------------|----------|-------|-----|-----|------------|------------|-------|----------------|---------------------------|---|---------------------------|---------|
| Short read WGS analysis                                     |             |     |     |          |          |                |                |          |       |     |     |            | Phasing    |       |                |                           |   |                           |         |
| Chr                                                         | Position    | Ref | Alt | Genotype | Coverage | Consequence    | Gene           | cDNA pos | Exon  | oAA | nAA | CADD Phred | Status     | Score | Region phased? |                           |   |                           | T hap # |
|                                                             |             |     |     |          |          |                |                |          |       |     |     |            |            |       | N              | N haplotype block         | T | T haplotype block         |         |
| 1                                                           | 115,258,747 | C   | T   | 0/1      | 22,22    | non-synonymous | <i>NRAS</i>    | 289      | 2/7   | G   | D   | 35         | phased     | 179   | Y              | 115,001,691 - 116,205,021 | Y | 115,001,691 - 115,308,500 | 2       |
| 1                                                           | 119,575,884 | C   | G   | 0/1      | 43,13    | non-synonymous | <i>WARS2</i>   | 760      | 6/6   | E   | Q   | 35         | phased     | 255   | Y              | 118,674,901 - 119,999,642 | Y | 118,618,567 - 119,845,956 | 1       |
| 2                                                           | 206,165,385 | C   | T   | 0/1      | 28,23    | stop gain      | <i>PARD3B</i>  | 2317     | 17/22 | R   | *   | 36         | phased     | 51    | Y              | 205,671,849 - 208,192,741 | Y | 205,701,987 - 206,280,521 | 1       |
| 6                                                           | 136,476,831 | G   | T   | 0/1      | 32,14    | non-synonymous | <i>PDE7B</i>   | 329      | 4/4   | D   | Y   | 29.4       | phased     | 223   | Y              | 136,144,830 - 136,515,751 | Y | 136,340,592 - 136,515,751 | 1       |
| 7                                                           | 104,766,776 | G   | A   | 0/1      | 32,21    | non-synonymous | <i>SRPK2</i>   | 255      | 4/6   | H   | Y   | 25.6       | phased     | 255   | Y              | 103,166,875 - 105,035,389 | Y | 104,158,828 - 105,737,510 | 2       |
| 7                                                           | 131,849,047 | C   | A   | 0/1      | 33,18    | stop gain      | <i>PLXNA4</i>  | 4583     | 24/32 | E   | *   | 45         | phased     | 32    | Y              | 130,254,925 - 133,924,029 | Y | 131,181,808 - 133,951,513 | 1       |
| 8                                                           | 23,190,978  | C   | T   | 0/1      | 10,16    | non-synonymous | <i>LOXL2</i>   | 1272     | 5/14  | C   | Y   | 28.6       | phased     | 126   | Y              | 22,021,130 - 28,213,699   | Y | 23,167,609 - 23,818,687   | 1       |
| 10                                                          | 91,522,548  | A   | G   | 1/1      | 1,21     | non-synonymous | <i>KIF20B</i>  | 5010     | 29/33 | K   | E   | 29.6       | homozygote | n/a   | Y              | 90,151,393 - 93,064,626   | Y | 90,669,755 - 93,025,598   | 1       |
| 12                                                          | 57,908,971  | T   | C   | 0/1      | 39,19    | non-synonymous | <i>MARS</i>    | 6        | 1/4   | I   | T   | 25.6       | phased     | 255   | N              | n/a                       | Y | 57,583,486 - 57,908,971   | 2       |
| 12                                                          | 112,512,522 | G   | A   | 0/1      | 39,25    | stop gain      | <i>NAA25</i>   | 1072     | 9/24  | R   | *   | 39         | phased     | 255   | Y              | 112,492,626 - 112,515,605 | Y | 112,389,476 - 112,527,982 | 1       |
| 13                                                          | 46,541,951  | G   | A   | 0/1      | 35,25    | stop gain      | <i>ZC3H13</i>  | 4358     | 15/19 | R   | *   | 45         | phased     | 255   | Y              | 45,740,791 - 50,237,729   | Y | 45,939,425 - 47,598,625   | 2       |
| 17                                                          | 7,578,211   | C   | T   | 0/1      | 10,22    | non-synonymous | <i>TP53</i>    | 638      | 5/7   | R   | Q   | 37         | phased     | 140   | Y              | 3,583,844 - 8,825,330     | Y | 7,533,025 - 8,220,432     | 2       |
| 17                                                          | 10,355,371  | C   | T   | 1/1      | 2,26     | non-synonymous | <i>MYH4</i>    | 3736     | 27/40 | E   | K   | 34         | homozygote | n/a   | Y              | 8,855,408 - 15,404,987    | Y | 10,222,462 - 11,635,630   | 1       |
| 17                                                          | 61,766,931  | G   | A   | 0/1      | 21,17    | non-synonymous | <i>MAP3K3</i>  | 1058     | 13/18 | R   | H   | 32         | not phased | 3     | N              | n/a                       | N | n/a                       | n/a     |
| 19                                                          | 30,164,924  | G   | A   | 0/1      | 25,25    | non-synonymous | <i>PLEKHF1</i> | 280      | 2/2   | D   | N   | 34         | not phased | 3     | Y              | 29,141,047 - 30,418,862   | Y | 29,141,047 - 30,418,862   | n/a     |
| X                                                           | 41,007,638  | C   | T   | 0/1      | 35,21    | non-synonymous | <i>USP9X</i>   | 1460     | 11/44 | A   | V   | 32         | not phased | 0     | N              | n/a                       | N | n/a                       | n/a     |
| X                                                           | 152,027,456 | T   | C   | 0/1      | 46,12    | non-synonymous | <i>NSDHL</i>   | 671      | 5/9   | V   | A   | 25.9       | not phased | 0     | N              | n/a                       | N | n/a                       | n/a     |

**Supplementary Table 11. Tumor-specific structural variants in Patient 1532.**

| Linked-read analysis |                           |              |                           |         | Breakdancer analysis |             |              |             |               |       | Read support |             |              |             |                             |
|----------------------|---------------------------|--------------|---------------------------|---------|----------------------|-------------|--------------|-------------|---------------|-------|--------------|-------------|--------------|-------------|-----------------------------|
| Breakpoint 1         |                           | Breakpoint 2 |                           | Q score | Breakpoint 1         |             | Breakpoint 2 |             | SV class      | Score | Breakpoint 1 |             | Breakpoint 2 |             | # Reads spanning breakpoint |
| Chr                  | Position                  | Chr          | Position                  |         | Chr                  | Position    | Chr          | Position    |               |       | Chr          | Position    | Chr          | Position    |                             |
| 6                    | 72,327,710 - 72,327,713   | 6            | 72,784,361 - 72,784,364   | 222     | 6                    | 72,327,703  | 6            | 72,784,371  | deletion      | 88    | 6            | 72,327,710  | 6            | 72,784,364  | 7                           |
| 8                    | 106,033,196 - 106,033,199 | 8            | 120,871,951 - 120,871,952 | 220     | 8                    | 106,033,426 | 8            | 120,872,188 | inversion     | 99    | 8            | 106,033,199 | 8            | 120,871,952 | 18                          |
| 11                   | 108,585,765 - 108,585,779 | 13           | 21,727,797 - 21,727,811   | 229     | 11                   | 108,585,849 | 13           | 21,750,514  | translocation | 99    | 11           | 108,585,748 | 13           | 21,750,678  | 31                          |
| 16                   | 6,530,000 - 6,540,000     | 16           | 6,610,000 - 6,620,000     | 221     | 16                   | 6,542,212   | 16           | 6,604,868   | deletion      | 96    | 16           | 6,542,223   | 16           | 6,604,872   | 38                          |
| 16                   | 33,410,000 - 33,420,000   | 6            | 370,000 - 380,000         | 222     | 16                   | 33,428,374  | 6            | 382,330     | translocation | 99    | 16           | 33,428,530  | 6            | 382,461     | 77                          |

Q score refers to quality.

**Supplementary Table 12. List of copy number alterations determined by linked-read analysis and short read segmentation.**

\* Linked-reads filter considers prediction quality score and interval size. Added validation was conducted by counting barcodes in the linked-read data.

| Chr | Interval    |             | Aberration type | Copy number | Normal mean barcode count (50 kb window) | Tumor mean barcode count (50kb window) | Tumor/Normal mean barcode ratio (50 kb window) | Normal mean read count (50 kb window) | Tumor mean read count (50 kb window) | Tumor/Normal mean read ratio (50 kb window) | *Predicted by linked-reads? |
|-----|-------------|-------------|-----------------|-------------|------------------------------------------|----------------------------------------|------------------------------------------------|---------------------------------------|--------------------------------------|---------------------------------------------|-----------------------------|
| 1   | 3,667,863   | 34,284,328  | Deletion        | 1.4         | 1,246                                    | 668                                    | 0.54                                           | 6,344                                 | 3,913                                | 0.62                                        | N                           |
| 2   | 213,693,504 | 215,882,694 | Deletion        | 1.2         | 1,727                                    | 966                                    | 0.56                                           | 10,777                                | 6,853                                | 0.64                                        | Y                           |
| 4   | 152,988,593 | 190,539,790 | Deletion        | 1.6         | 1,667                                    | 1,118                                  | 0.67                                           | 9,995                                 | 7,678                                | 0.77                                        | N                           |
| 5   | 132,833,428 | 135,468,042 | Deletion        | 1.4         | 1,383                                    | 741                                    | 0.54                                           | 7,217                                 | 4,532                                | 0.63                                        | Y                           |
| 5   | 166,595,763 | 167,913,468 | Deletion        | 1.3         | 1,632                                    | 955                                    | 0.59                                           | 9,657                                 | 6,457                                | 0.67                                        | Y                           |
| 6   | 24,208,288  | 24,266,019  | Amplification   | 3.3         | 1,710                                    | 2,610                                  | 1.53                                           | 10,273                                | 20,816                               | 2.03                                        | Y                           |
| 6   | 72,327,538  | 72,784,577  | Deletion        | 1.2         | 1,835                                    | 1,022                                  | 0.56                                           | 11,470                                | 7,572                                | 0.66                                        | Y                           |
| 8   | 16,724,979  | 34,391,059  | Deletion        | 1.1         | 1,607                                    | 904                                    | 0.56                                           | 9,461                                 | 6,085                                | 0.64                                        | Y                           |
| 8   | 69,514,845  | 146,364,022 | Amplification   | 2.8         | 1,623                                    | 1,964                                  | 1.21                                           | 9,677                                 | 13,603                               | 1.41                                        | N                           |
| 9   | 140,363,011 | 140,435,225 | Amplification   | 4.0         | 908                                      | 1,390                                  | 1.53                                           | 3,306                                 | 5,828                                | 1.76                                        | N                           |
| 10  | 86,029,818  | 99,706,269  | Deletion        | 1.3         | 1,591                                    | 913                                    | 0.57                                           | 9,493                                 | 6,282                                | 0.66                                        | Y                           |
| 10  | 98,603,610  | 98,670,456  | Deletion        | 0.6         | 1,849                                    | 389                                    | 0.21                                           | 11,585                                | 2,390                                | 0.21                                        | Y                           |
| 12  | 145,809     | 1,408,212   | Amplification   | 2.6         | 1,571                                    | 1,701                                  | 1.08                                           | 8,984                                 | 11,007                               | 1.23                                        | N                           |
| 14  | 36,950,751  | 37,431,290  | Amplification   | 2.7         | 1,619                                    | 1,897                                  | 1.17                                           | 9,416                                 | 13,424                               | 1.43                                        | Y                           |
| 14  | 67,021,632  | 67,270,506  | Deletion        | 1.5         | 1,786                                    | 1,231                                  | 0.69                                           | 11,436                                | 8,938                                | 0.78                                        | Y                           |
| 15  | 20,000,078  | 102,432,398 | Deletion        | 1.3         | 1,465                                    | 818                                    | 0.56                                           | 8,418                                 | 5,409                                | 0.64                                        | N                           |
| 15  | 34,710,279  | 34,819,363  | Deletion        | 0.9         | 688                                      | 113                                    | 0.16                                           | 3,668                                 | 720                                  | 0.20                                        | Y                           |
| 15  | 62,824,643  | 62,966,870  | Deletion        | 0.8         | 1,620                                    | 395                                    | 0.24                                           | 9,642                                 | 2,478                                | 0.26                                        | Y                           |
| 15  | 102,432,538 | 102,521,293 | Amplification   | 3.1         | 520                                      | 374                                    | 0.72                                           | 1,415                                 | 1,191                                | 0.84                                        | N                           |
| 16  | 5,553,164   | 7,351,018   | Deletion        | 1.5         | 1,629                                    | 1,158                                  | 0.71                                           | 9,858                                 | 7,939                                | 0.81                                        | Y                           |
| 16  | 6,541,933   | 6,604,871   | Deletion        | 0.7         | 1,644                                    | 627                                    | 0.38                                           | 10,071                                | 4,354                                | 0.43                                        | Y                           |
| 17  | 349         | 22,249,120  | Deletion        | 1.4         | 1,322                                    | 722                                    | 0.55                                           | 7,072                                 | 4,447                                | 0.63                                        | N                           |
| 18  | 112,698     | 78,017,072  | Deletion        | 1.3         | 1,554                                    | 874                                    | 0.56                                           | 9,102                                 | 5,878                                | 0.65                                        | N                           |
| 20  | 14,752,676  | 15,234,961  | Deletion        | 1.5         | 1,670                                    | 1,155                                  | 0.69                                           | 9,768                                 | 8,269                                | 0.85                                        | Y                           |
| 22  | 16,062,595  | 16,475,093  | Amplification   | 2.6         | 273                                      | 199                                    | 0.73                                           | 623                                   | 498                                  | 0.80                                        | N                           |
| 22  | 16,456,492  | 51,239,045  | Deletion        | 1.4         | 1,212                                    | 661                                    | 0.55                                           | 6,161                                 | 3,879                                | 0.63                                        | N                           |

**Supplementary Table 13. Comparison of different phasing approaches.**

|                               | <b>Barcode library described by Zheng et al.</b>                                                                                                                                    | <b>Peters et. al.<sup>3</sup></b>                                                                                                               | <b>Amini et. al.<sup>4</sup></b>                                                                               | <b>de Vree et. al.<sup>5</sup></b>                                                                                                                                      | <b>Regan et. al.<sup>6</sup></b>                                                                                                   | <b>Borgstrom et. al.<sup>7</sup></b>                                                                                   |
|-------------------------------|-------------------------------------------------------------------------------------------------------------------------------------------------------------------------------------|-------------------------------------------------------------------------------------------------------------------------------------------------|----------------------------------------------------------------------------------------------------------------|-------------------------------------------------------------------------------------------------------------------------------------------------------------------------|------------------------------------------------------------------------------------------------------------------------------------|------------------------------------------------------------------------------------------------------------------------|
| <b>Approach</b>               | Partition genomes to droplets and construct sequencing libraries to phase and call structural variants of whole genome or exome. Libraries are compatible with Illumina sequencers. | High molecular genomic DNA is separated into 384 wells, then barcoded during library construction for sequencing on Complete Genomics platform. | Combinatorially index genomic DNA with transposase and PCR. Libraries are compatible with Illumina sequencers. | Use proximity ligation to link genetic loci that are spatially close. Capture fragments of interest for NGS library construction and sequencing on Illumina sequencers. | Partition alleles into droplets, and use digital droplet PCR and allele-specific fluorescence probes to detect phasing of alleles. | Use emulsion compartmentalization to barcode single DNA molecules, and demonstrate phasing of bacterial 16S sequences. |
| <b>Targeted?</b>              | Genome-wide, but compatible with targetting                                                                                                                                         | Genome-wide                                                                                                                                     | Genome-wide                                                                                                    | Yes                                                                                                                                                                     | Yes, one SNP pair per well                                                                                                         | Yes                                                                                                                    |
| <b># of partitions</b>        | >100K droplets                                                                                                                                                                      | 384 wells                                                                                                                                       | 10K virtual compartments                                                                                       | N/A                                                                                                                                                                     | 20K droplets                                                                                                                       | 2M droplets*                                                                                                           |
| <b>Input</b>                  | ~1ng human genomic DNA (~60 molecules per bead, at 50 kb)                                                                                                                           | 100pg of human DNA                                                                                                                              | 100ng high molecular weight human genomic DNA (average size of 100-200kb)                                      | 100000g pellets containing crude nuclear extracts                                                                                                                       | high molecular weight DNA of 10-20ng                                                                                               | 1 molecule per bead                                                                                                    |
| <b>Sequencing requirement</b> | ~30X                                                                                                                                                                                | ~80X                                                                                                                                            | ~40X                                                                                                           | N/A                                                                                                                                                                     | N/A                                                                                                                                | N/A                                                                                                                    |
| <b>Phasing performance</b>    | phase >97% SNPs, N50=0.9-2.8Mb                                                                                                                                                      | phase >90% heterozygous SNVs, N50=0.5-1.6Mb                                                                                                     | phasing of >95% of heterozygous variants, N50=1.4-2.3Mb                                                        | phase >98% SNVs of BRCA1 allele                                                                                                                                         | can phase long genomic distances up to 200kb                                                                                       | phasing of 16S rRNAs                                                                                                   |

\*M = million

## Supplementary Note 1. Phasing linked-reads

The set of mapped reads for each barcode is clustered into groups such that each group has no gap between neighboring reads larger than 50 kb. These groups are very likely to originate from a single input molecule (>99.5%). Each read group is assigned a molecule index  $f$ . We record the Phred score and molecule index for each read supporting each allele of heterozygous variants. Variant phasing is determined by finding a phasing configuration of heterozygous variants that maximizes the likelihood of the observed reads and associated molecular indices (1). The following equation details the likelihood algorithm that we employed.

$$P(O|X) = \prod_f P(O_{1,f}, \dots, O_{N,f}|X) \quad (1)$$

Where

- $P(O_{1,f}, \dots, O_{N,f}|X) = \frac{1-\alpha}{2} (\prod_i P(O_{i,f}|A_{i,f}) + \prod_i P(O_{i,f}|A_{i,1-X_i})) + \alpha \prod_i 0.5$ ,
- $\log P(O_{i,f}|A_{i,p}) = \sum_r 1(S_r = A_{i,p}) \left(1 - 10^{-\frac{Q_r}{10}}\right) + 1(S_r \neq A_{i,p}) \left(10^{-\frac{Q_r}{10}}\right)$ ,
- $O_{i,f}$ = observed read and barcode support at variant  $i$ , from molecule  $f$ ,
- $A_{i,p}$ = allele on phase  $p$  at variant  $i$ ,
- $X_i$ = phasing of variant  $i$ ,
- $S_r = A_{i,p}$ : read  $r$  matches allele  $A_{i,p}$ ,
- $Q_r$  = phred score of read  $r$ ,
- $\alpha$  = allele collision probability, and
- $\log_{10}$  is used.

The search for the maximum-likelihood phasing configuration is organized as follows: first, we find near-optimal local haplotype configurations with a beam search algorithm over blocks of



~40 adjacent variants. Second, the relative phasing of the blocks is determined with a greedy sweep over the block junctions. Third, we invert the haplotype assignment of individual variants to find local improvement to the phasing, and iterate until convergence. Last, the phasing configuration is broken into phase blocks that have a high probability of being internally correct. We determine the breakpoint of a phase block at each variant; this process involves comparing the log-likelihoods of the optimal configuration with a configuration where all variants to the right of the current variant have their haplotype assignment inverted (an empirically derived threshold of 0.995 was used). The confidence of the phasing assignment of single variants is computed as the log-likelihood ratio between the optimal configuration and optimal configuration with the test variant inverted.

We use a Phred-like phasing score to quantify the phasing quality at each variant, with

$$PQ_i = -10\log\left(\frac{P(\text{data}|\langle\text{best solution with variant } i \text{ flipped}\rangle)}{P(\text{data}|\langle\text{best solution}\rangle)}\right) \quad (2)$$

Where

- $P(\text{data}|\text{solution}) = \text{likelihood function modeling the observed data,}$
- $\langle \text{best solution} \rangle = \text{final phasing result that maximizes the likelihood, and}$
- $\text{Log}_{10}$  is used.

To evaluate the performance of our phasing algorithm, we calculated the following metrics:

- %SNVs phased = fraction of heterozygous SNVs from input VCF that were confidently phased
- % genes phased (< 100 kb) = fraction of genes with total genomic size less than 100kb

where all SNVs were contained in the same phase block

- N50 phase block = phase block size  $X$  such that half the phased genome is covered by phase blocks longer than  $X$ , and half the phased genome is covered by blocks shorter than  $X$ . A phase block is contiguous set of variants whose relative phasing has been determined by the algorithm, whereas phase block size is defined as the genomic distance between the first and last variant in the block.
- Longest phase block = the single longest phase block in the results

As additional assessment of phasing performance, we plotted the probability of any two SNVs being correctly phased over the distance between the SNVs. All phased SNVs in each phase block were considered in this analysis.

The lower the frequency of SNVs, the fewer reads and barcode support the SNVs will have. In order to phase 2 SNVs, there needs to be at least a read covering each SNV, and the reads need to have the same barcode. The lower the number of linked-reads per molecule, the less likely such rare heterozygous variants will be phased. This can be improved if (a) sequencing coverage goes up, (b) input DNA amount decreases, or (c) the input molecule size increases.

We calculated switch errors by comparing our phasing results to phasing ground-truth dataset as listed in **Table 1**. We compute short and long switch errors as by previously reported<sup>4</sup>.

Briefly, short switch errors are individual variants with incorrect phasing and long switch errors are positions where the relative phasing of variants before the position is incorrect compared to variants after that position. Phasing errors are decomposed into short and long switch errors with a Viterbi recursion<sup>4</sup> that scores short switch errors as -1 and long switch errors as -5, and finds an error assignment that maximizes the total score. Switch error rates are reported as the error rate per variant with ground truth phasing available.

Ground truth comparison data originated from the following public data sets as reported by Cleary *et al.*<sup>8</sup> and Kitzman *et al.*<sup>9</sup>:

1.) [ftp://ftp-](ftp://ftp-trace.ncbi.nih.gov/giab/ftp/data/NA12878/variant_calls/RTG//phasing_annotated.vcf.gz)

[trace.ncbi.nih.gov/giab/ftp/data/NA12878/variant\\_calls/RTG//phasing\\_annotated.vcf.gz](ftp://ftp-trace.ncbi.nih.gov/giab/ftp/data/NA12878/variant_calls/RTG//phasing_annotated.vcf.gz)

2.) [ftp://ftp-](ftp://ftp-trace.ncbi.nih.gov/giab/ftp/data/NA12878/variant_calls/RTG//ppp_full_cohort_withDNP.merged_avr0.15.vcf.gz)

[trace.ncbi.nih.gov/giab/ftp/data/NA12878/variant\\_calls/RTG//ppp\\_full\\_cohort\\_withDNP.merged\\_avr0.15.vcf.gz](ftp://ftp-trace.ncbi.nih.gov/giab/ftp/data/NA12878/variant_calls/RTG//ppp_full_cohort_withDNP.merged_avr0.15.vcf.gz)

3.) [ftp://ftp-](ftp://ftp-trace.ncbi.nih.gov/giab/ftp/data/NA12878/variant_calls/RTG//family_3.merged_avr0.15.vcf.gz)

[trace.ncbi.nih.gov/giab/ftp/data/NA12878/variant\\_calls/RTG//family\\_3.merged\\_avr0.15.vcf.g  
z](ftp://ftp-trace.ncbi.nih.gov/giab/ftp/data/NA12878/variant_calls/RTG//family_3.merged_avr0.15.vcf.gz)

4.) [http://krishna.gs.washington.edu/indianGenome/indian\\_snps\\_phased.vcf](http://krishna.gs.washington.edu/indianGenome/indian_snps_phased.vcf)

## **Supplementary Note 2. Structural variant calling from linked-read data**

A series of different approaches were used depending on the origin of the Linked-Reads from either whole genome versus exome approaches.

*a) Whole genome sequencing data.* To call large-scale structural variants, we bin the genome into 10 kb windows and count the different barcodes of mapping quality Q60 reads within each window. We use a binomial test to find all pairs of regions that are at least 50 kb apart (or on different chromosomes) and share more barcodes than what would be expected by chance (using a p-value cutoff of  $10^{-15}$  without any multiple hypothesis correction). We found that this cutoff was loose enough to include all interesting regions of potential structural variation. The number of pairs of genomic loci that we need to compare at this step is roughly in the order of  $10^{10}$ . In order to perform these comparisons efficiently, we encode the set of barcodes in each

genomic window as non-zero entries in a (very sparse) matrix and use sparse matrix multiplications to identify regions with overlaps.

This procedure allows us to quickly identify candidate regions for structural variation. However, the binomial test generates a very large number of false positives since it does not account for many aspects of the system, such as the length distribution of the library molecules and the variation in the amplification rate across GEMs. In a second pass, we use a probabilistic approach to clean up this initial candidate list.

First, we obtain an estimate of the set of library molecules by joining nearby reads (within 30 kb) with the same barcode. In the following discussion, we will use the term “fragment” to refer to a span of nearby reads with the same barcode. Fragments originate from some unobserved molecules (that may be longer than the observed fragments). Based on the set of fragments, we estimate quantities such read generation rate (sequenced reads per bp) of individual GEMs, the number of molecules inside each partition, and the molecule length distribution.

Given a pair of candidate windows  $W_1, W_2$ , we find the sets of fragments that overlap them and then identify pairs of fragments in  $W_1$  and  $W_2$  with the same barcode. Such pairs are potentially evidence for structural variation, since they suggest that the same molecule might have spanned two relatively distant loci of the genome. To quantify this evidence, we compute the following likelihood ratio score:

$$LR = \frac{P(\text{observed fragments} \mid SV)}{P(\text{observed fragments} \mid \text{no } SV)} \quad (3)$$

Since fragments with different barcodes are independent, this score decomposes to a product of terms with one term for each of the pairs of fragments with the same barcode  $b$ :

$$\frac{P(r_1, r_2, l_1, l_2, d \mid SV; a_b)}{P(r_1, r_2, l_1, l_2, d \mid no\ SV; a_b)} \quad (4)$$

where:

- $r_1, r_2$  are the number of reads on each of the two fragments,
- $l_1, l_2$  are the observed lengths of the two fragments,
- $d$  is the distance between the two fragments, and
- $a_b$  is the rate (reads/bp) of the GEM/barcode  $b$ .

The two candidate fragments might have originated from the same molecule or from different molecules, therefore:

$$\begin{aligned} P(r_1, r_2, l_1, l_2, d \mid SV; a_b) = \\ P(r_1, r_2, l_1, l_2, d \mid same\ molecule, SV; a_b)P(same\ molecule \mid SV) + \\ P(r_1, r_2, l_1, l_2, d \mid different\ molecules, SV; a_b)P(different\ molecules \mid SV) \quad (5) \end{aligned}$$

The probability assuming that the fragments originated from different molecules is:

$$P(r_1, r_2, l_1, l_2, d \mid different\ molecules, SV; a_b) = P_{frag}(r_1, l_1; a_b)P_{frag}(r_2, l_2; a_b) \quad (6)$$

where  $P_{frag}(r, l; a_b)$  is the probability of observing  $r$  reads from a molecule of unknown length such that the reads span an observed length of  $l$ .

Assuming that the reads are generated from a Poisson process with constant rate across the genome, the following is calculated:

$$P_{frag}(r, l; a_b) = \sum_{m:m \geq l} \left( r(r-1) \left( \frac{l}{m} \right)^{r-2} \frac{m-l}{m^2} \right) P_p(r; ma_b) P_L(m) = \sum_{m:m \geq l} (m-l) P_p(r-2; a_b l) P_p(0; a_b(m-l)) a_b^2 P_L(m) \quad (7)$$

where  $P_p(r; b)$  is the probability mass function of a Poisson distribution with parameter  $b$  and  $P_L(m)$  is the (pre-estimated) probability that the true molecule length is  $m$ .

The probability given that the fragments came from the same molecule can be computed in a similar way as:

$$\sum_{m:m \geq l_1+l_2+d} (m-l_1-l_2-d) P_p(r_1-2; a_b l_1) P_p(r_2-2; a_b l_2) P_p(0; a_b(m-l_1-l_2)) a_b^4 P_L(m) \quad (8)$$

In the presence of an SV, the likelihood is similar to equation (3). However, in this case, there is an additional unknown, namely the exact position of the breakpoints with respect to the observed fragments. For instance, assume that there was a deletion between positions 100,000 and 200,000 of chromosome 1 and that the observed fragments span the regions 85,000 - 90,000 and 210,000 - 230,000. If we knew the exact breakpoints, we could use the previous calculations with  $d$  set to  $10 \text{ kb} + 10 \text{ kb} = 20 \text{ kb}$ . Since the position of the true breakpoints (and therefore the true distance between the observed fragments) is unknown, we obtain an estimate of  $d$  by computing the largest extent  $d'$  such that  $P_p(0; a_b d') > 0.75$ . Then, we set  $d = 2d'$  and proceed as described before.

*b) Targeted sequencing data.* In the case of targeted sequencing such as exome linked-reads, we need to account for the composition of the target set. We assume that the off-target regions

generate reads following a similar Poisson process as the target regions, but with a different rate. In particular, let  $b_t$  be the fraction of reads on target and  $g_t$  be the fraction of the genome that is covered by the target regions. If  $a_b$  is the Poisson rate (related to barcode b) of target regions, then the rate of off-target regions is:

$$\tilde{a}_b = \frac{1-b_t g_t}{1-g_t b_t} a_b \quad (9)$$

The probability of observing  $r$  reads from a region that contains  $l_t$  bp of targets and  $l_n$  bp of off-target regions is:

$$P_{mixture}(r, l_t, l_n; a_b, \tilde{a}_b) = \sum_{n=0}^{n=r} P_p(r-n; a_b l_t) P_p(n; \tilde{a}_b l_n) \quad (10)$$

The probability of observing  $r$  reads from a molecule of unknown length that spanned an observed length of  $l = l_t + l_n$  is:

$$\sum_{m:l \leq m} P_{mixture}(r-2, l_t, l_n; a_b, \tilde{a}_b) a_b^2 P_L(m) \sum_{f \in \text{offsets}} P_{mixture}(0, d_{f_t}, d_{f_n}; a_b, \tilde{a}_b) \quad (11)$$

where the inner sum is taken over all  $m - l$  offsets of the unobserved molecule with respect to the observed fragment, and  $d_{f_t}$  and  $d_{f_n}$  are the bases on and off-target for the corresponding offset. To simplify calculations, for a given value of  $m$ , we compute the average fraction of bases on and off-target across all offsets and assume that all offsets have the same target composition.

The rest of the probabilities needed to compute (2) are adjusted in a similar way from the WGS case. In practice all probabilities were computed in log-space to avoid underflows. We used a

log-likelihood ratio cutoff of 200. We empirically found that this cutoff resulted in high-quality calls with very low false positive rates after the filtering steps described below.

*c) Refining breakpoints using short read information.* After obtaining breakpoint windows using the approach described above, we used information from read pairs and split reads to further refine the breakpoint locations. For each called structural variant, we selected all read pairs and split reads within the called breakpoint windows. We used a probabilistic approach similar to a previous study<sup>10</sup> to infer the breakpoint loci based on the combined evidence from all selected read pairs and split reads. In order to avoid false positives, we only attempted to infer the exact breakpoint loci when there were at least 4 read pairs and split reads supporting the call.

*d) Filtering calls based on gaps and segmental duplications.* We excluded SV calls whose breakpoints overlap different copies of the same segmental duplication (using the Segmental Duplication track from the UCSC browser). Structural variation is enriched in such regions<sup>11</sup>, so some of these calls might represent true events. However, we noticed that a large fraction of calls in regions of structural variation are the result of the inability of aligners to properly resolve repetitive regions, since a small amount of variation is sufficient to make reads map uniquely and with high mapping quality to one or the other copy of the segmental duplication.

We further excluded SV calls that are within 10 kb from gaps (using the gaps track from the UCSC browser) or from new sequence introduced in hg38 (using the hg19 diff track from the UCSC browser). SV calls in these regions are likely related to assembly errors in constructing the hg19 reference builds.



## References

1. Pendleton, M. et al. Assembly and diploid architecture of an individual human genome via single-molecule technologies. *Nat Methods* (2015).
2. Kidd, J.M. et al. Mapping and sequencing of structural variation from eight human genomes. *Nature* **453**, 56-64 (2008).
3. Peters, B.A. et al. Accurate whole-genome sequencing and haplotyping from 10 to 20 human cells. *Nature* **487**, 190-195 (2012).
4. Amini, S. et al. Haplotype-resolved whole-genome sequencing by contiguity-preserving transposition and combinatorial indexing. *Nature genetics* **46**, 1343-1349 (2014).
5. de Vree, P.J. et al. Targeted sequencing by proximity ligation for comprehensive variant detection and local haplotyping. *Nature biotechnology* **32**, 1019-1025 (2014).
6. Regan, J.F. et al. A rapid molecular approach for chromosomal phasing. *PloS one* **10**, e0118270 (2015).
7. Borgstrom, E. et al. Phasing of single DNA molecules by massively parallel barcoding. *Nature communications* **6**, 7173 (2015).
8. Cleary, J.G. et al. Joint variant and de novo mutation identification on pedigrees from high-throughput sequencing data. *Journal of computational biology : a journal of computational molecular cell biology* **21**, 405-419 (2014).
9. Kitzman, J.O. et al. Haplotype-resolved genome sequencing of a Gujarati Indian individual. *Nature biotechnology* **29**, 59-63 (2011).
10. Layer, R.M., Chiang, C., Quinlan, A.R. & Hall, I.M. LUMPY: a probabilistic framework for structural variant discovery. *Genome biology* **15**, R84 (2014).
11. Mills, R.E. et al. Mapping copy number variation by population-scale genome sequencing. *Nature* **470**, 59-65 (2011).
